# Supplementary material for: Polyurethane/polycaprolactone membrane grafted with conjugated linoleic acid for artificial vascular graft application
Source: PubMed Central journal article supplement — Sci Technol Adv Mater. 2020 Feb 4;21(1):56–66. doi: 10.1080/14686996.2020.1718549 (PMC7033711; doi:10.1080/14686996.2020.1718549), 2020-02-04
Supplement: TSTA_A_1718549_SM4564.pdf [file TSTA_A_1718549_SM4564.pdf]

## Supplemental information

### Plasma treatment

The membranes were plasma-treated using the Plasma Cleaner (PDC-32G-2, Harrick Plasma, USA). The membranes were treated for 45 seconds under High RF settings (18W).

### Tensile stress-strain curve

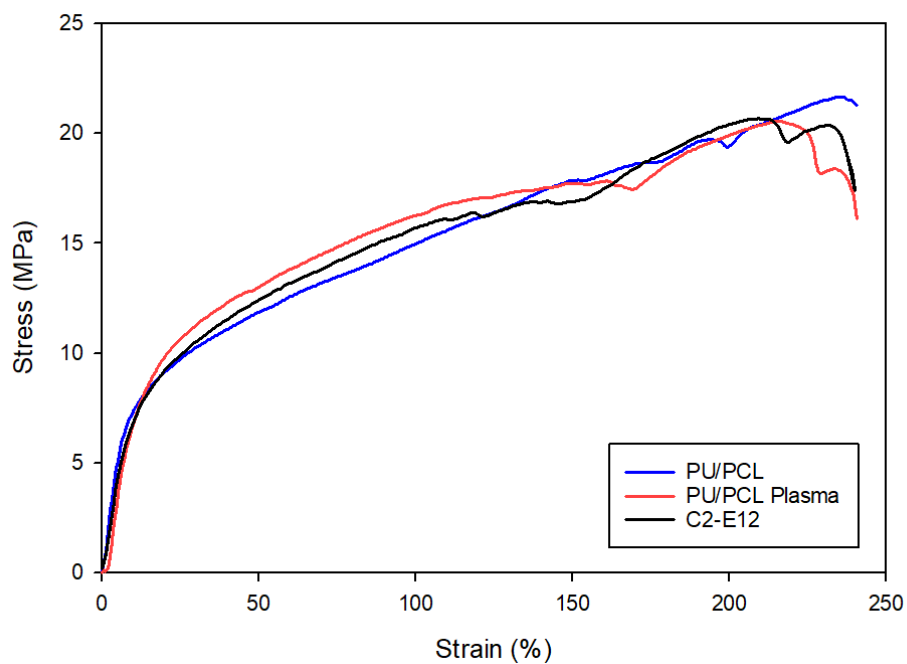

**Figure S1.** Stress-strain curve of the membranes when subjected to tension.
